# Supplementary material for: Continuous flow synthesis and scale-up of glycine- and taurine-conjugated bile salts
Source: Royal Society of Chemistry journal article supplement (doi:10.1039/c2ob25528f), 2012-01-01

## Supporting Information

### Continuous Flow Synthesis and Scale-up of Glycine- and Taurine-Conjugated Bile Salts

Francesco Venturoni, Antimo Gioiello,\* Roccaldo Sardella, Benedetto Natalini, Roberto Pellicciari

*Dipartimento di Chimica e Tecnologia del Farmaco, Università degli Studi di Perugia, Via del Liceo 1,  
06123 Perugia, Italy.*

\*To whom correspondence should be addressed. Tel: +39.075.5852318. Fax: +39.075.5855160.

E-mail: antimo@chimfarm.unipg.it

**Spectral Data (<sup>1</sup>H and <sup>13</sup>C NMR)**

**S2-S9**

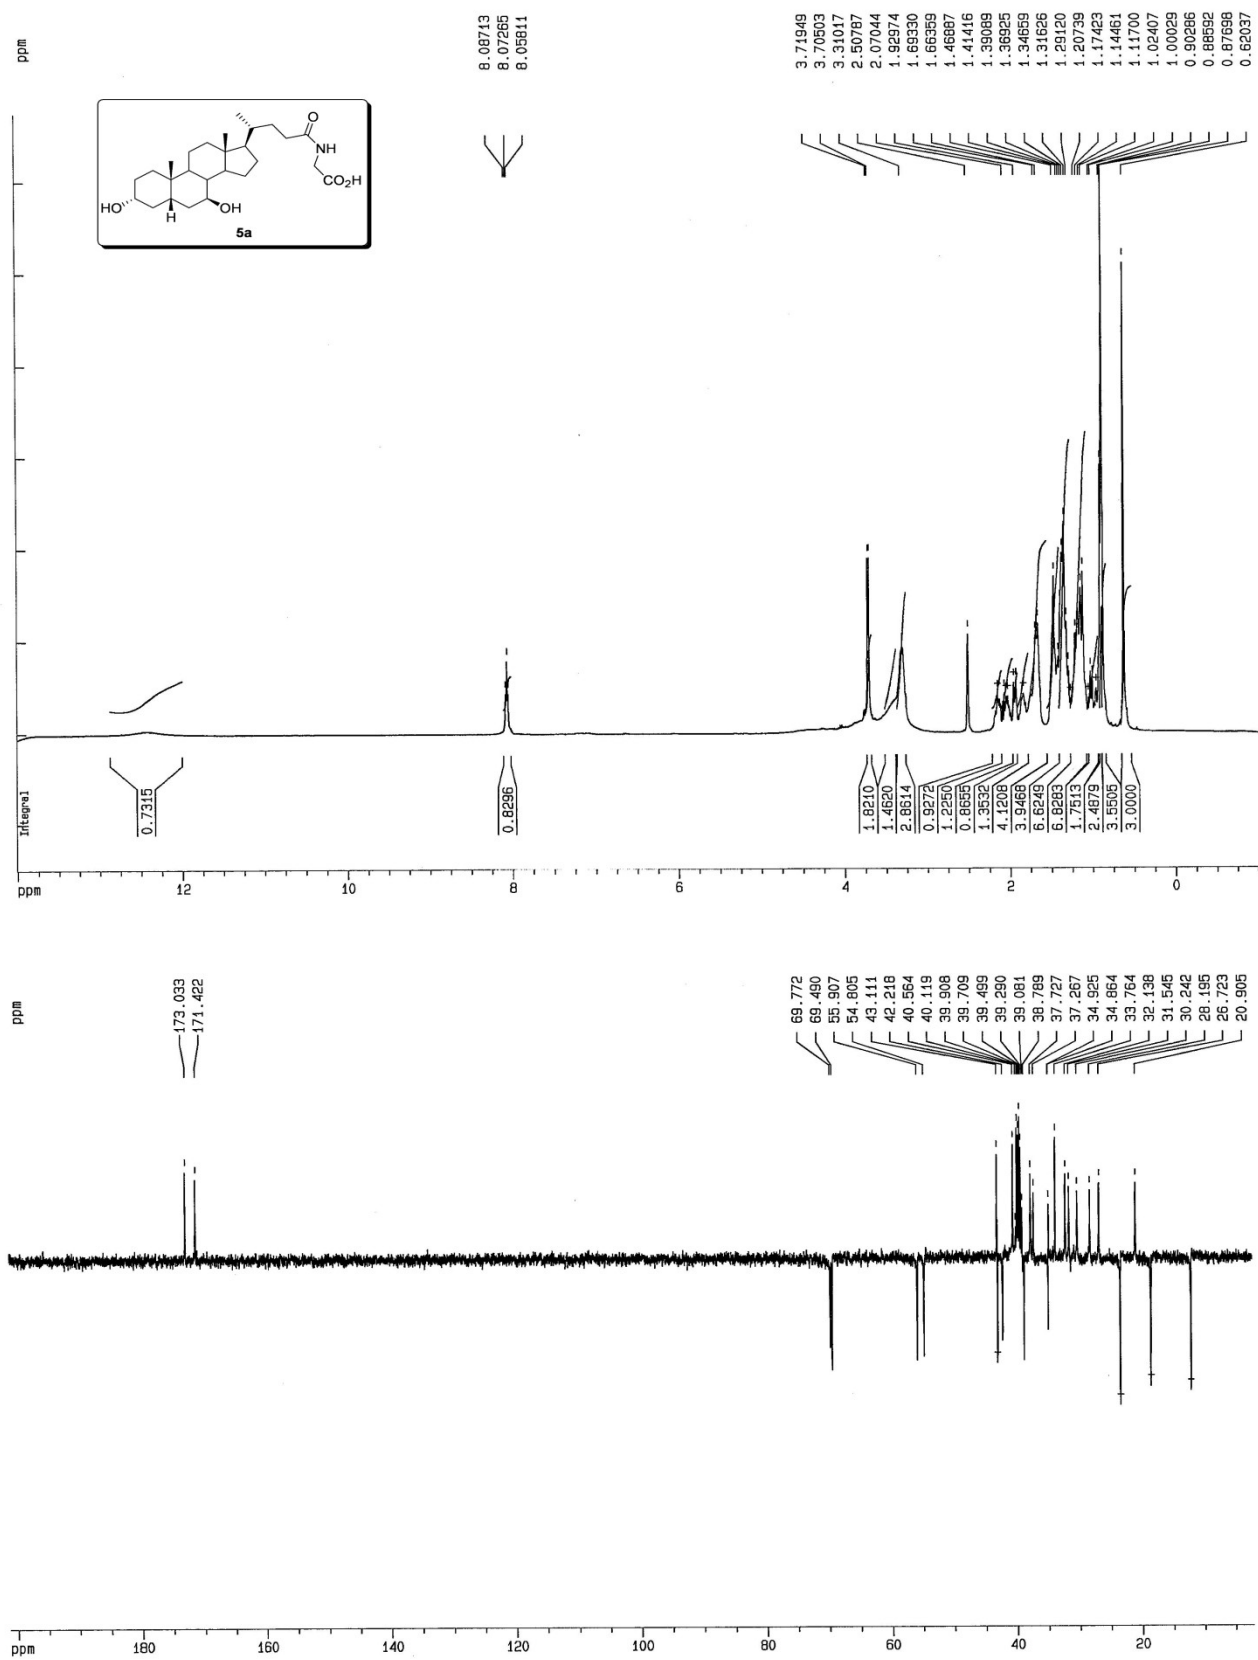

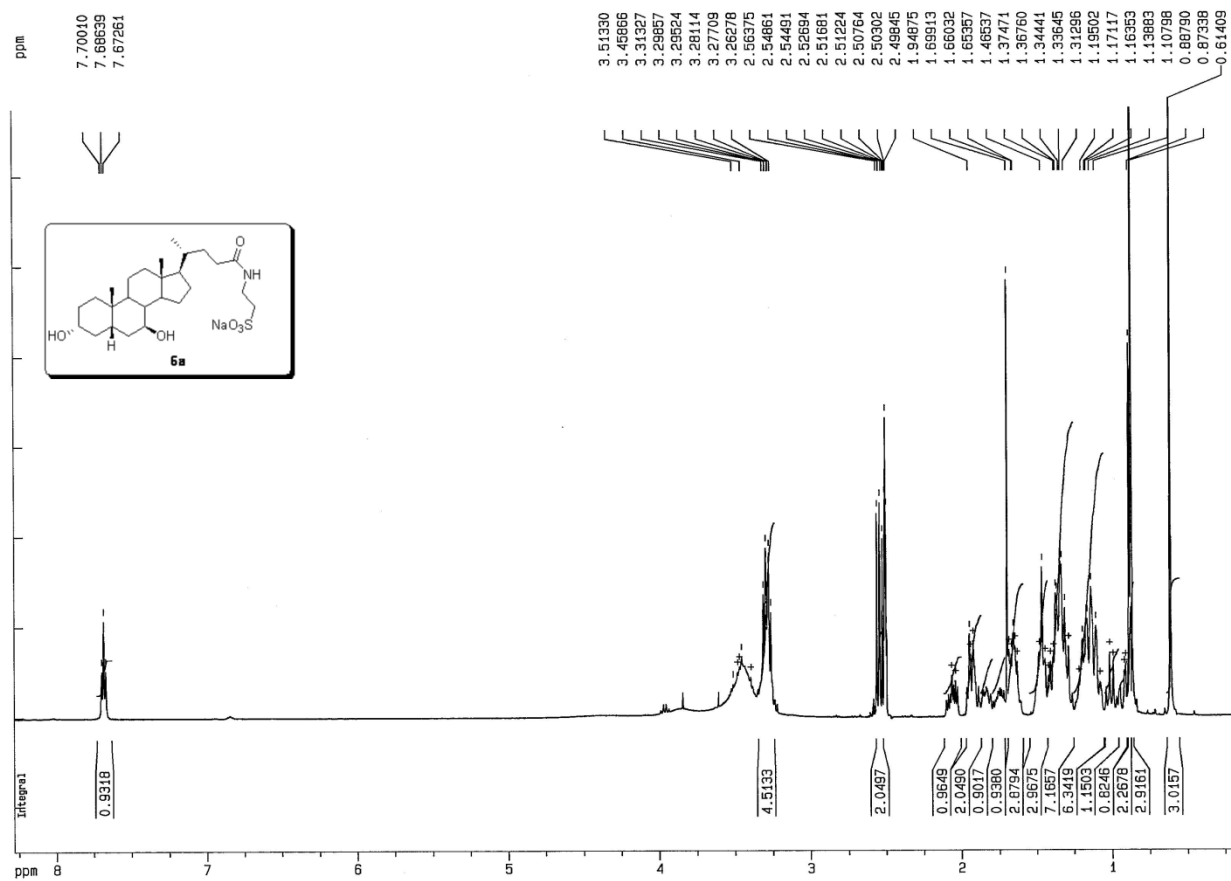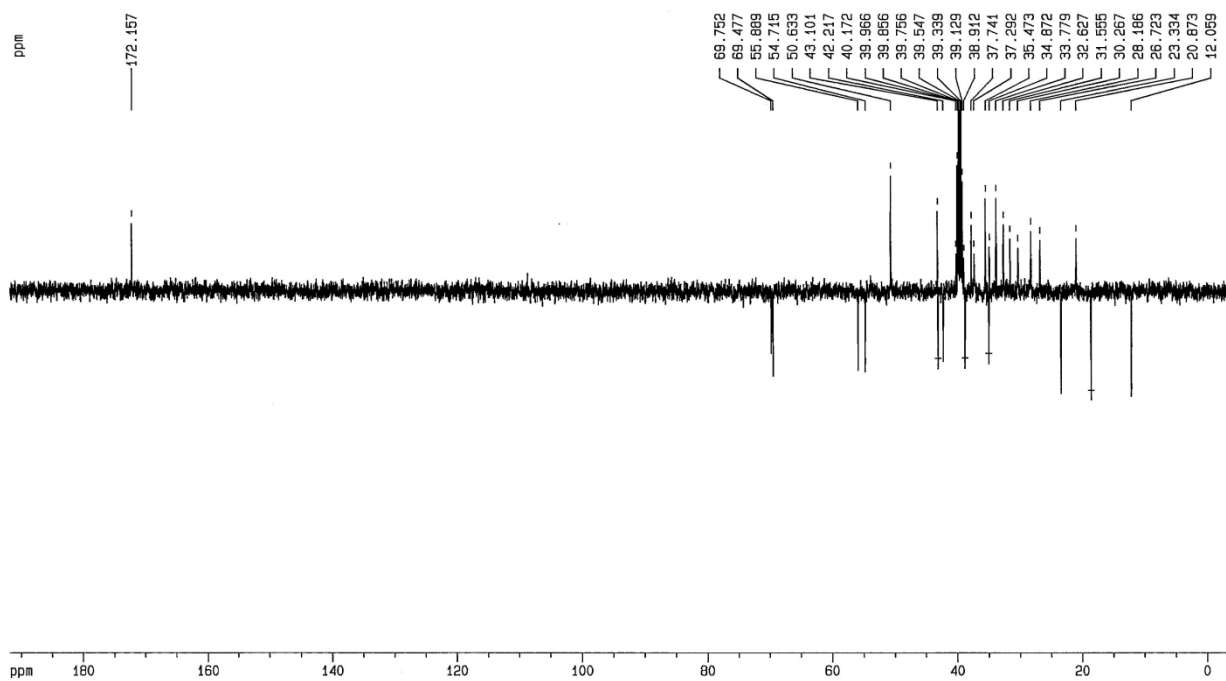

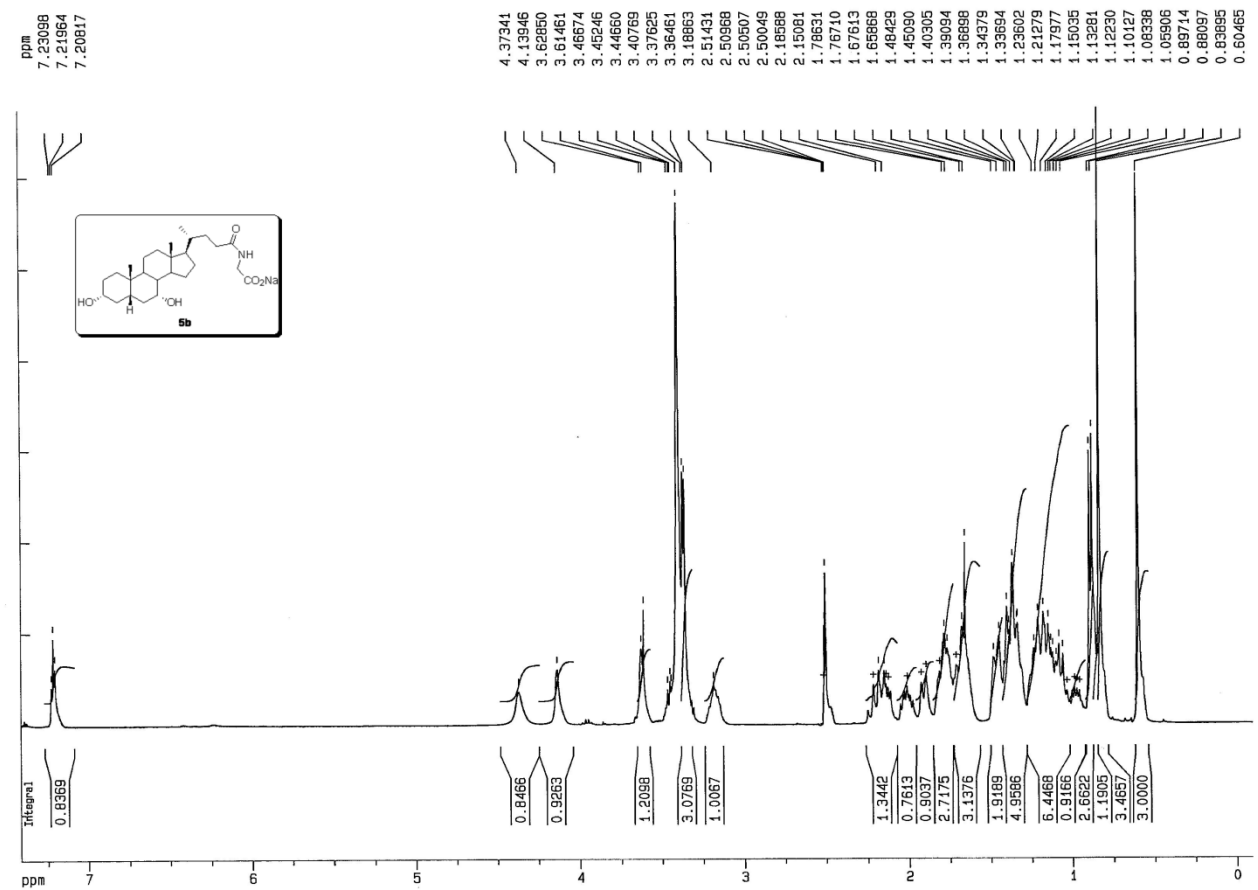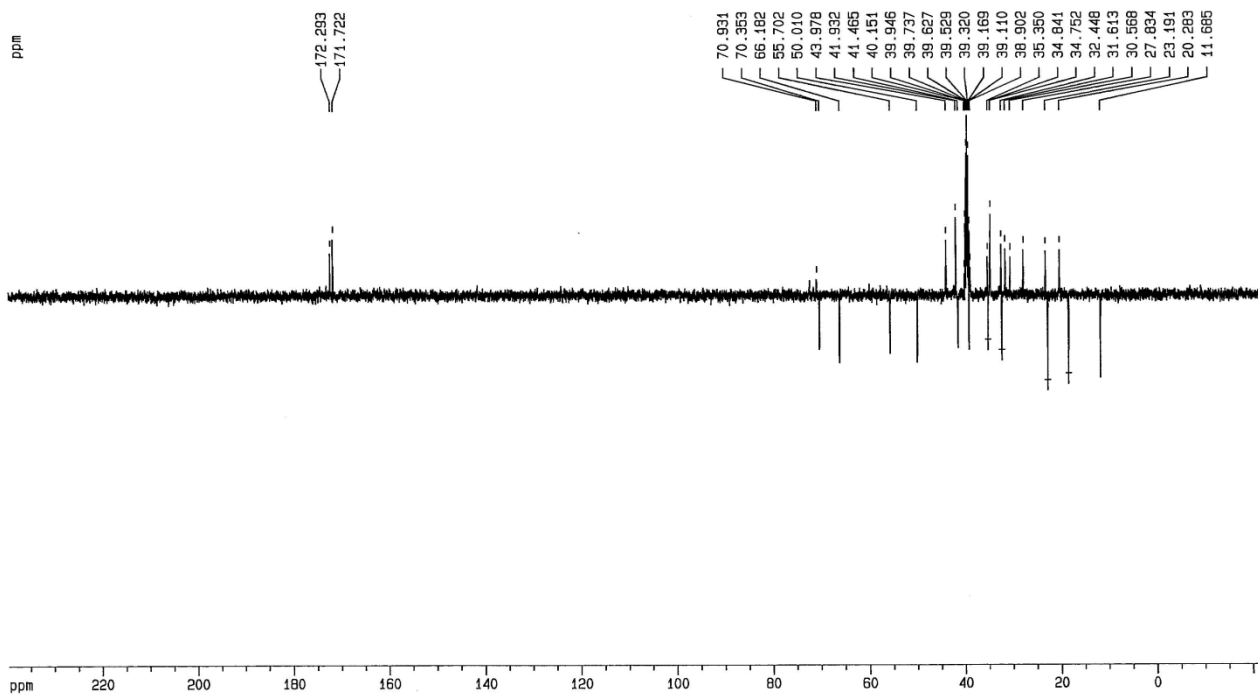

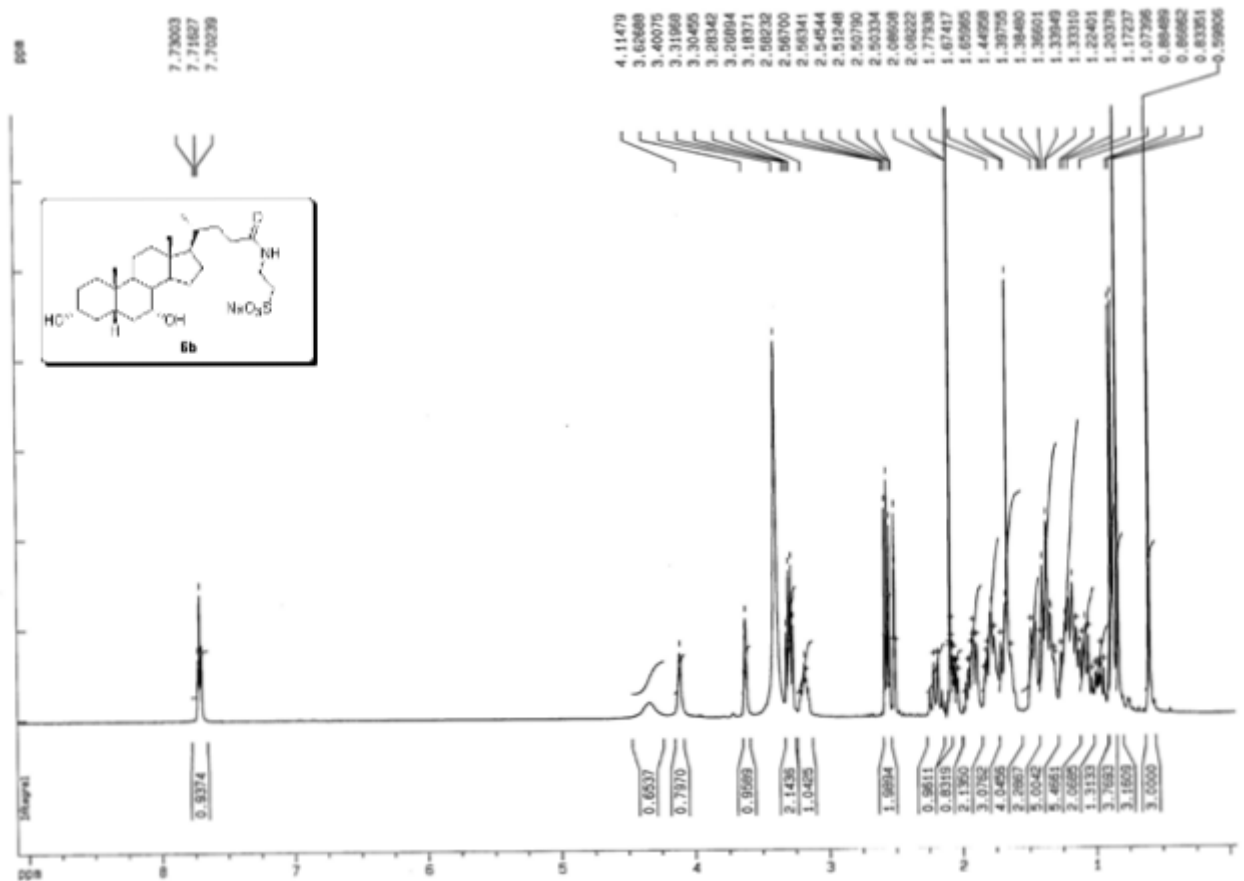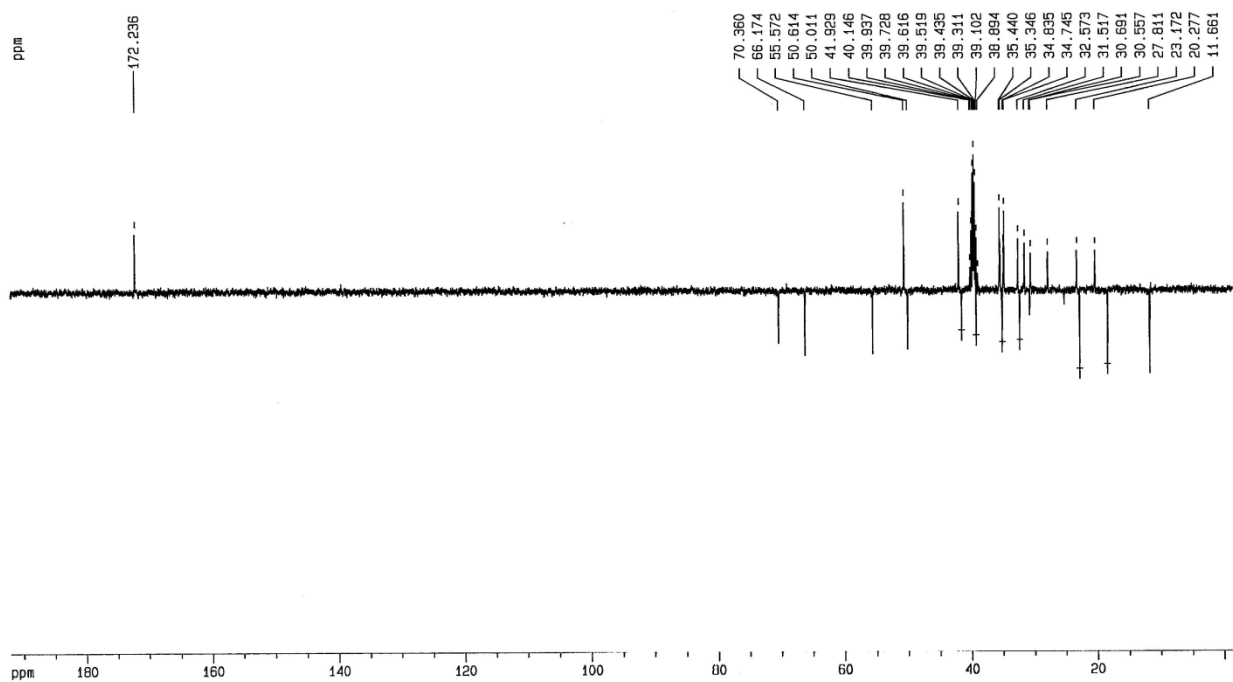

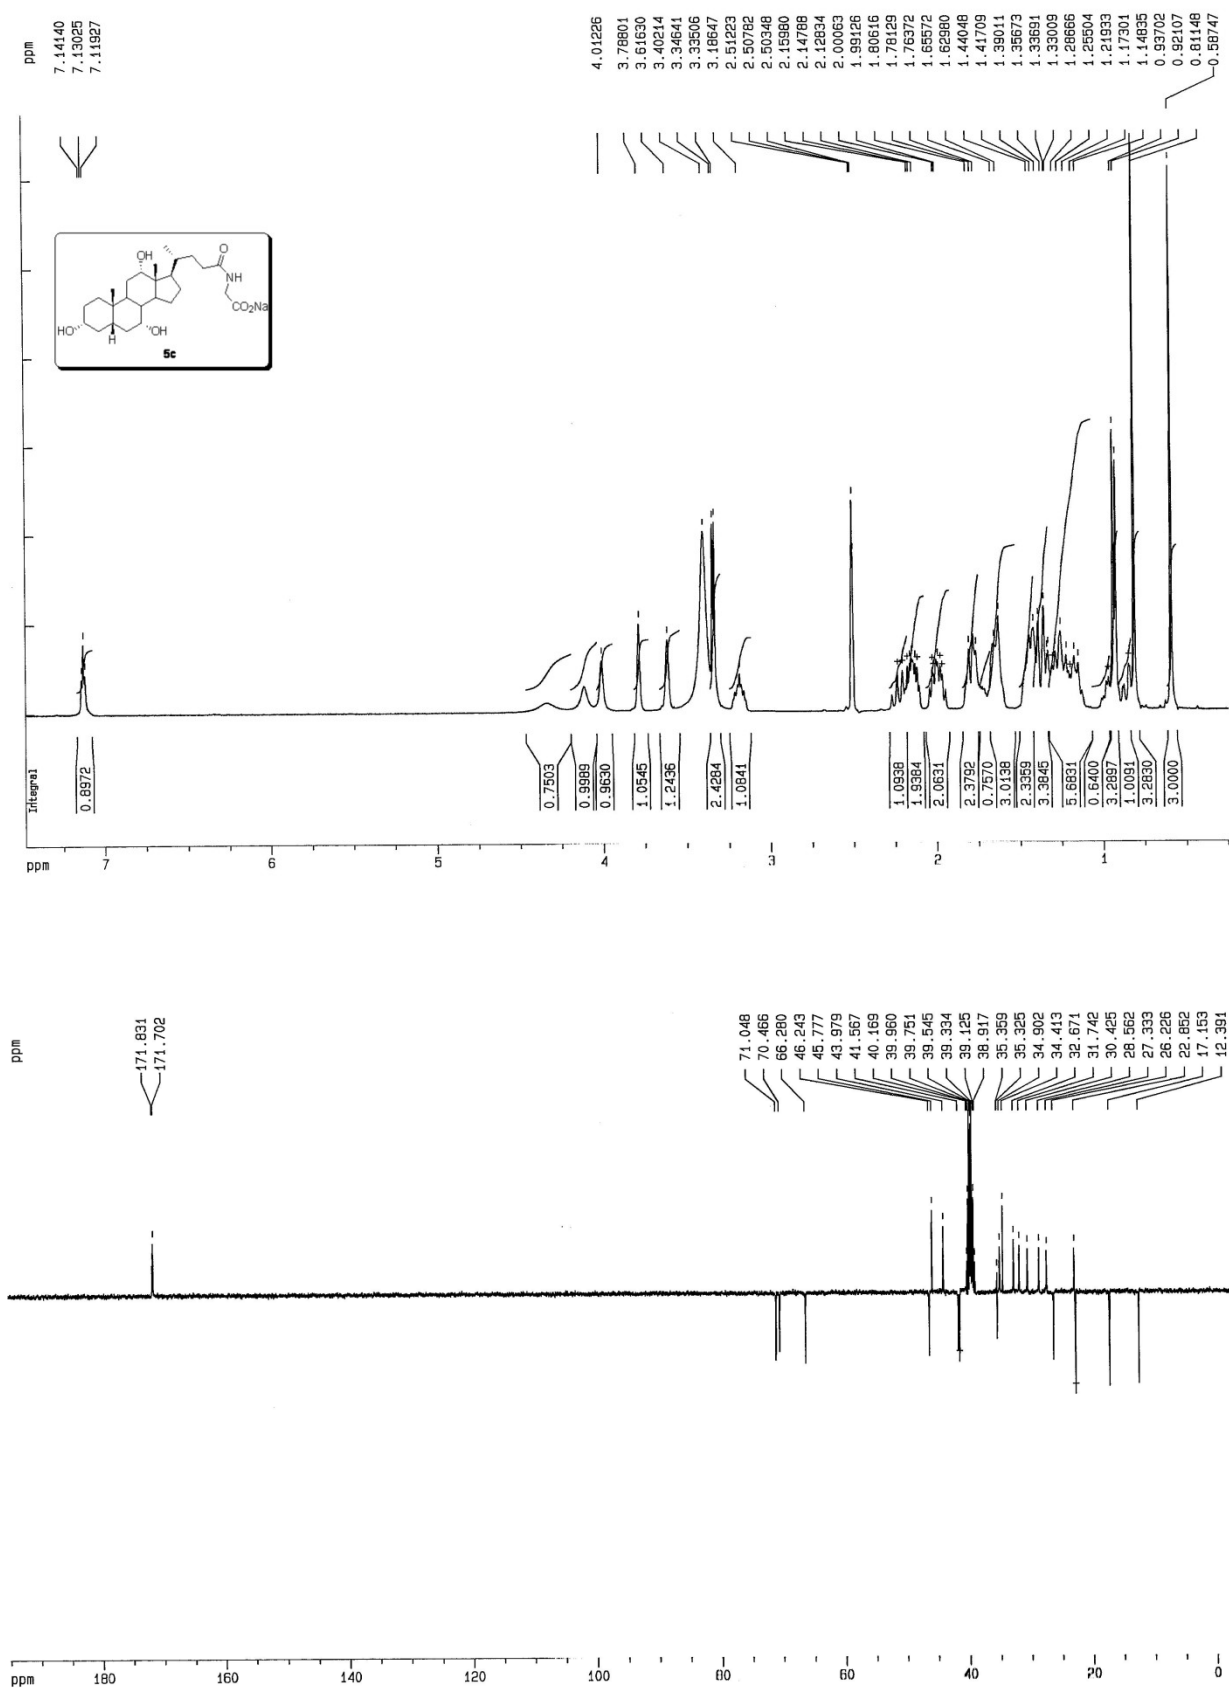

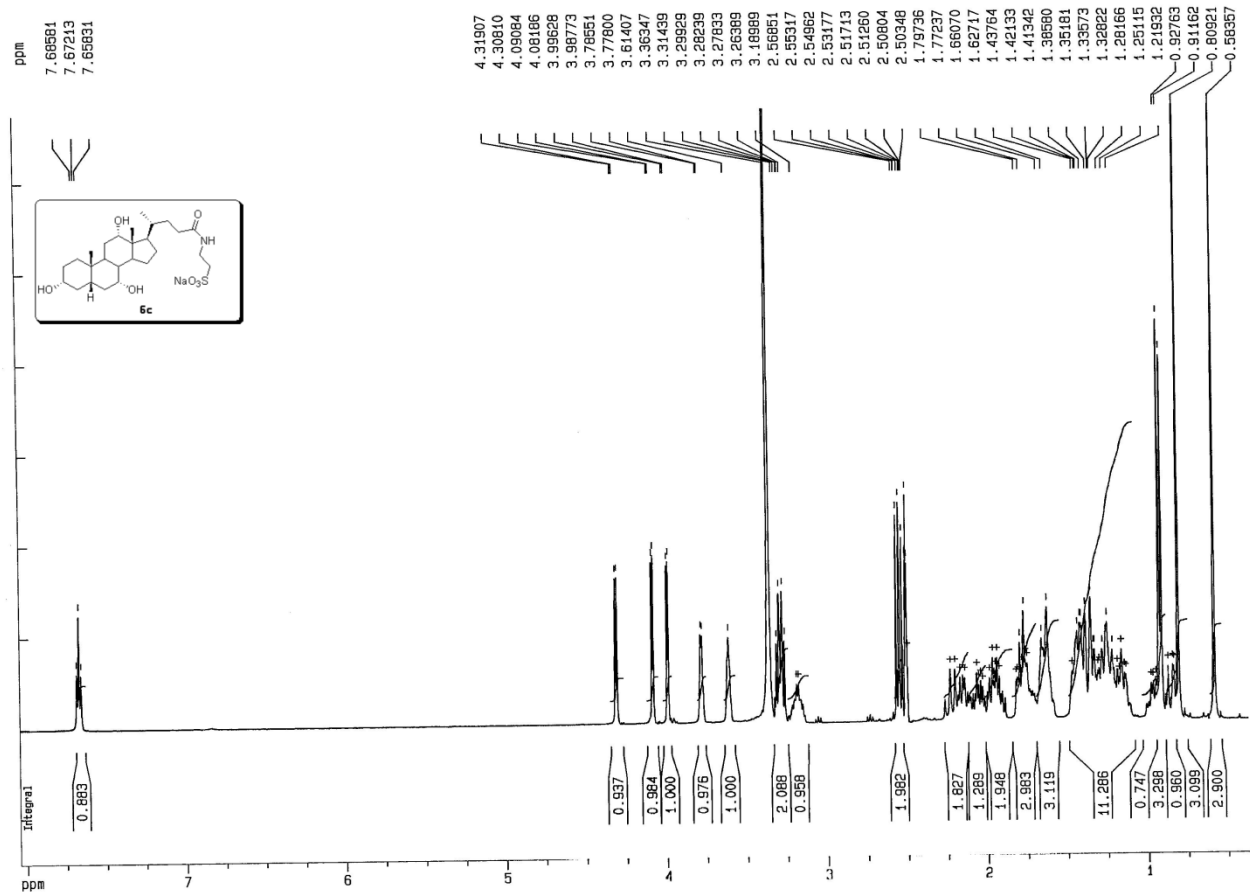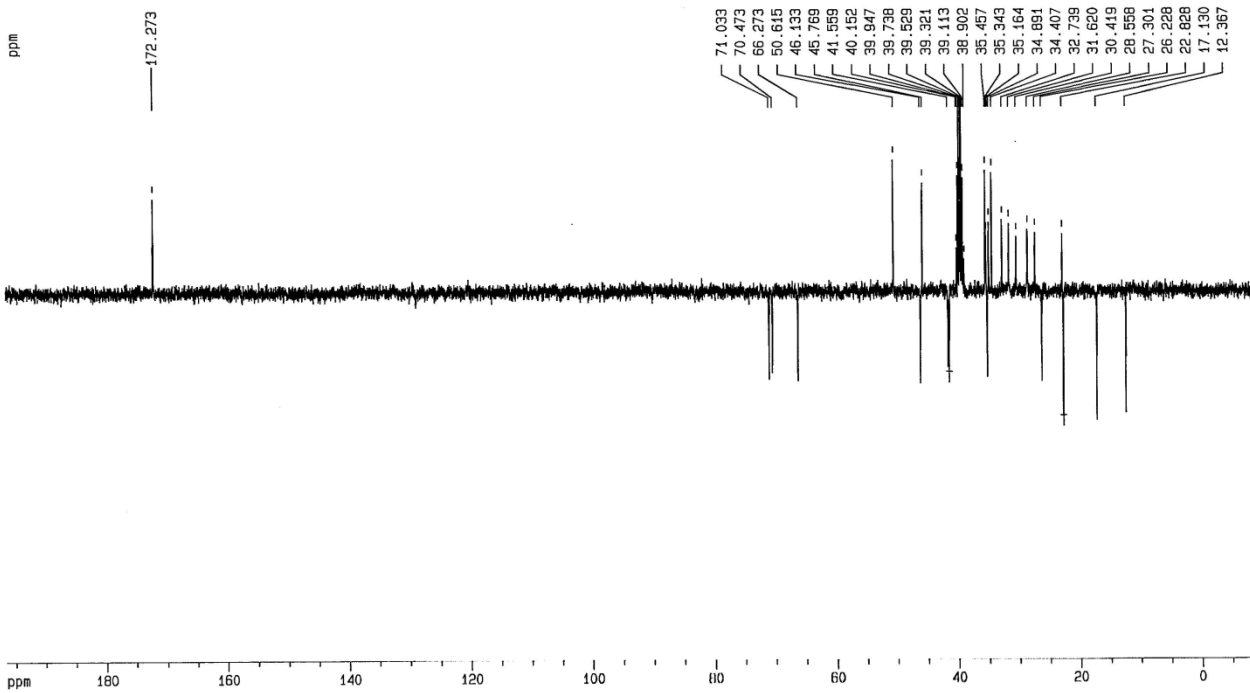

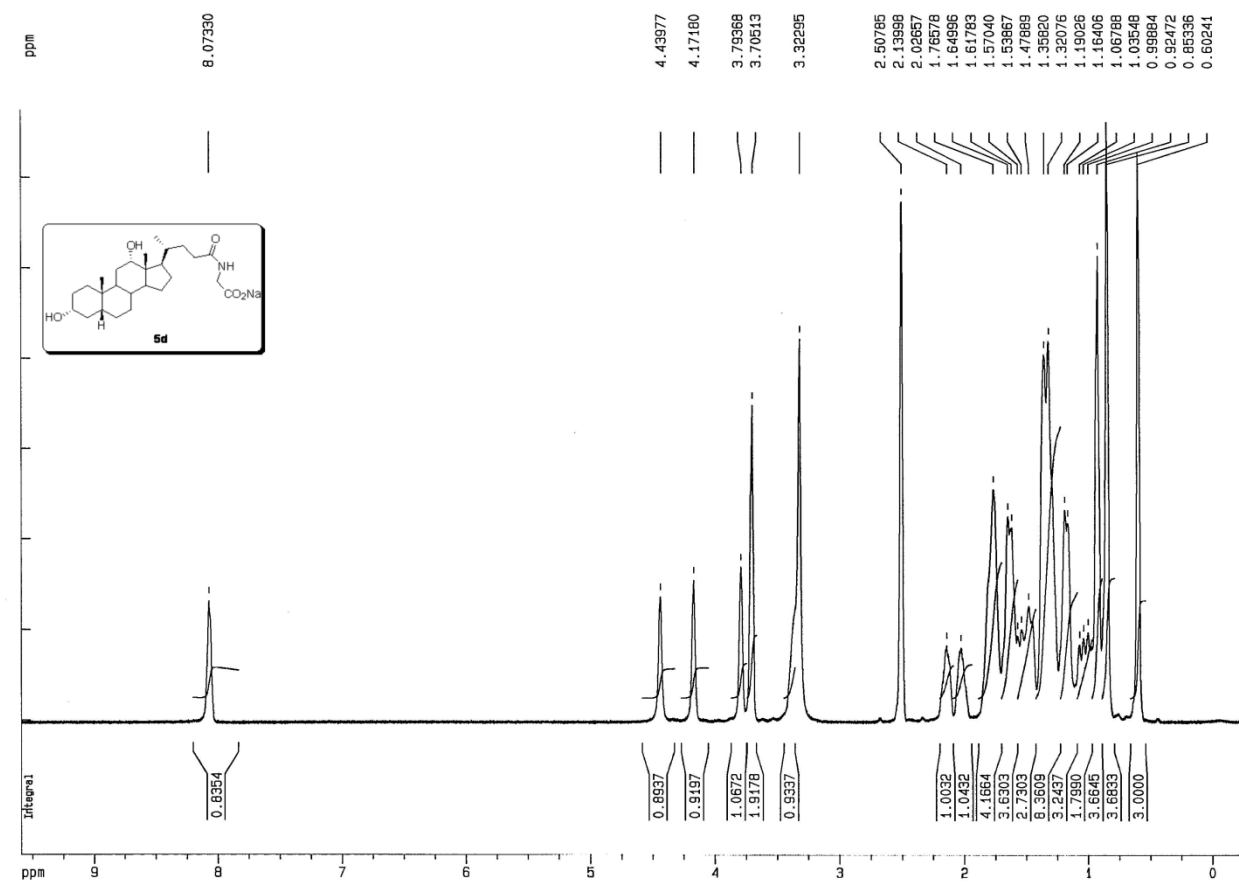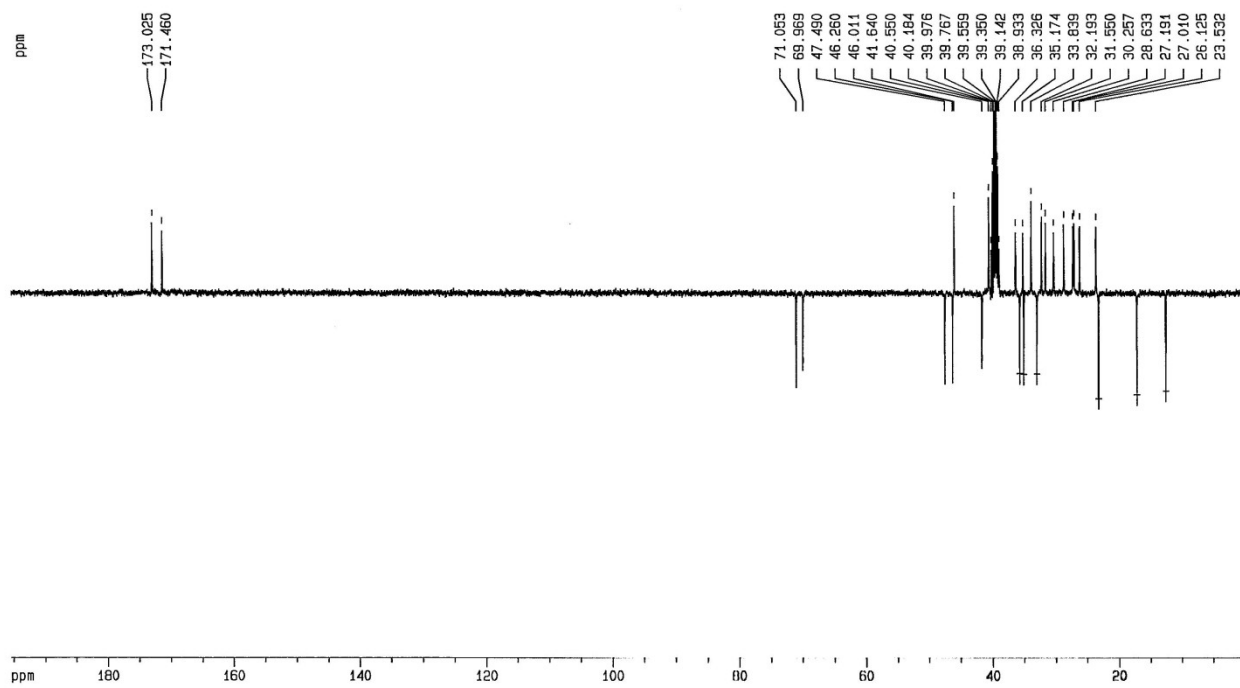



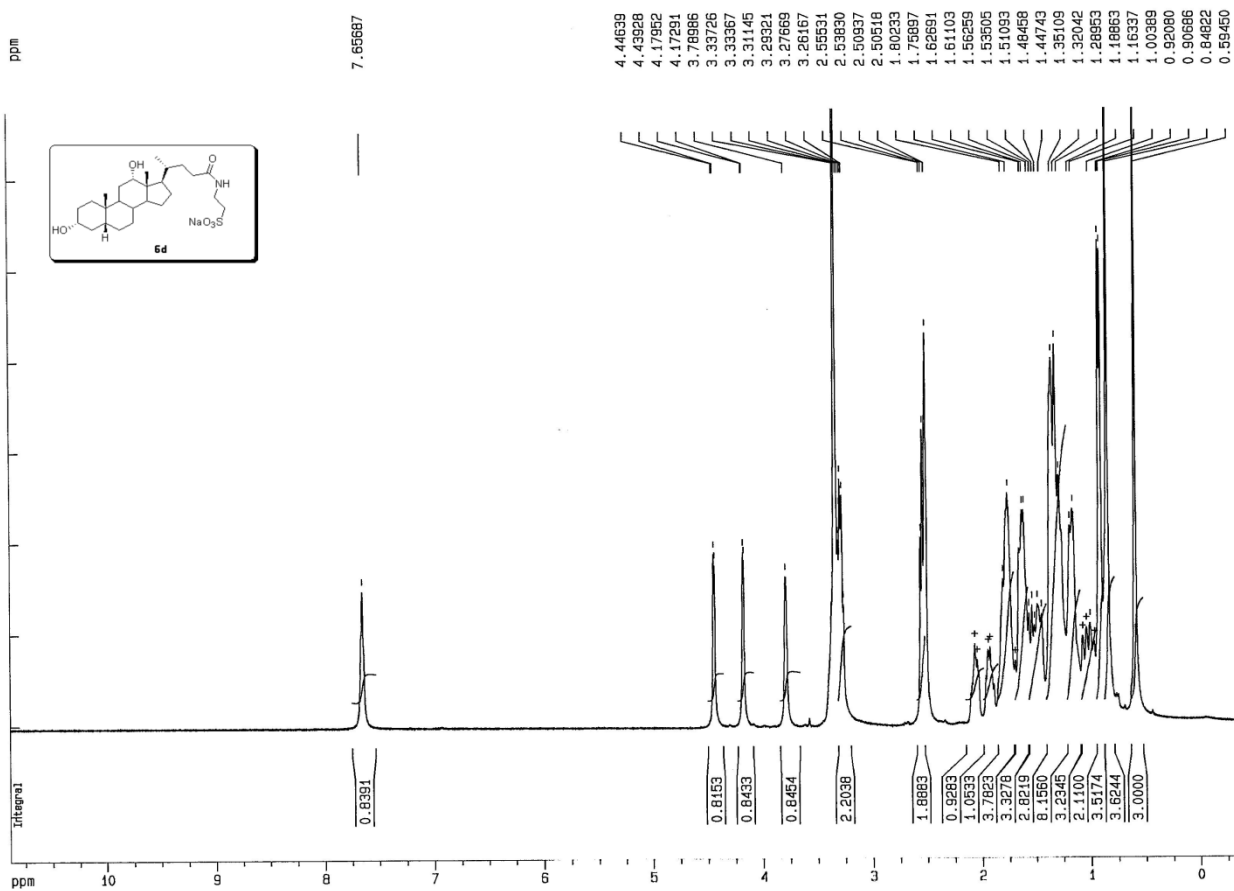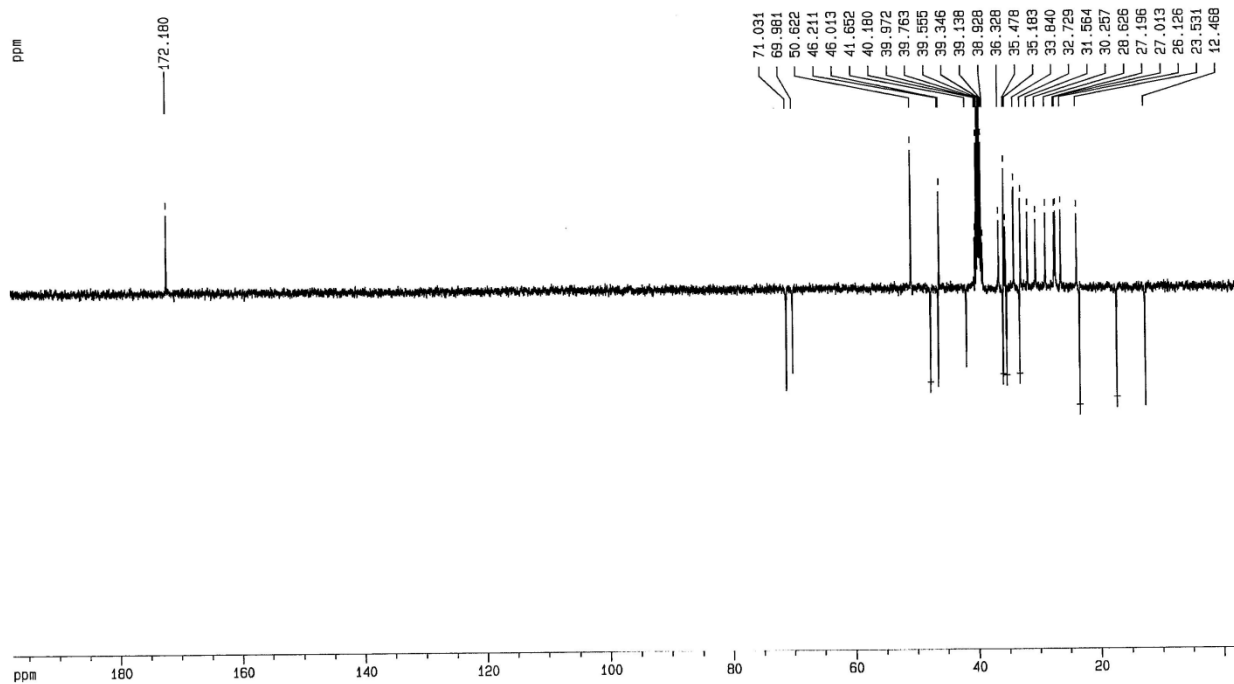

Supplement: c2ob25528f.pdf [file c2ob25528f.pdf]
